# Supplementary material for: QTL Epistasis Plays a Role of Homeostasis on Heading Date in Rice
Source: Preprints.org preprint supplement (doi:10.20944/preprints202306.1799.v2), 2023-07-31
Supplement: Supplementary file 2 [file Table S1.docx]

Table S1 Analysis of variance on phenotypic values of heading date in the three environments. were the variance components of error, genotype, environment and genotypeenvironment, respectively. represented the numbers of replication, genotype and environment, respectively.

| Source | DF | Sum square | Mean square | F value | Pr>F | EMS |
| --- | --- | --- | --- | --- | --- | --- |
| Environment | 2 | 60726.66 | 30363.33 | 14659.60 | <0.0001 |  |
| Genotype | 64 | 43828.74 | 684.82 | 330.64 | <0.0001 |  |
| Genotype x Environment | 128 | 1411.62 | 11.03 | 5.32 | <0.0001 |  |
| Error | 374 | 774.64 | 2.07 |  |  |  |
| Corrected Total | 568 | 106741.65 |  |  |  |  |
